# Supplementary material for: Driving Factors Influencing Soil Microbial Community Succession of Coal Mining Subsidence Areas during Natural Recovery in Inner Mongolia Grasslands
Source: MDPI journal article supplement (doi:10.3390/microorganisms12010087), 2023-12-31
Supplement: s1 [file s1]

**Table S1.** Main Plants in the Study Area.

| Family name                       | Lifestyle     | Latin scientific name                              |
|-----------------------------------|---------------|----------------------------------------------------|
| Plantaginaceae Juss.              | Biennial or   |                                                    |
|                                   | perennial     | <b>Plantago asiatica</b> L.                        |
|                                   | herb          |                                                    |
| Euphorbiaceae Juss.               | Annual herb   | <b>Euphorbia humifusa</b> Willd.                   |
|                                   | Annual herb   | <b>Euphorbia thymifolia</b> L.                     |
| Fabaceae Lindl.                   | Perennial     |                                                    |
|                                   | herb          | <b>Astragalus laxmannii</b> Jacq.                  |
|                                   | Perennial     |                                                    |
|                                   | herb          | <b>Medicago sativa</b> L.                          |
|                                   | Biennial herb | <b>Melilotus officinalis</b> (L.) Pall.            |
|                                   | Perennial     |                                                    |
|                                   | herb          | <b>Astragalus scaberrimus</b> Bunge                |
|                                   | Perennial     |                                                    |
|                                   | herb          | <b>Oxytropis coerulea</b> (Pall.) DC.              |
| Poaceae Barnhart.                 | Perennial     |                                                    |
|                                   | herb          | <b>Leymus chinensis</b> (Trin.) Tzvel.             |
| Apocynaceae Juss.                 | Grassy or     |                                                    |
|                                   | subshrub-like | <b>Cynanchum thesioides</b> (Freyn) K. Schum.      |
|                                   | vines         |                                                    |
| Asteraceae Bercht.<br>& J. Presl. | Perennial     |                                                    |
|                                   | herb          | <b>Inula britannica</b> Linnaeus                   |
|                                   | Perennial     |                                                    |
|                                   | herb          | <b>Taraxacum mongolicum</b> Hand.-Mazz.            |
|                                   | Perennial     | <b>Takhtajaniantha mongolica</b> (Maxim.) Zaika,   |
|                                   | herb          | Sukhor. & N. Kilian                                |
|                                   | Perennial     |                                                    |
|                                   | herb          | <b>Artemisia mongolica</b> (Fisch. ex Bess.) Nakai |
|                                   | Perennial     |                                                    |
|                                   | herb          | <b>Artemisia integrifolia</b> L.                   |
|                                   | Annual herb   | <b>Parthenium hysterophorus</b> L.                 |
|                                   | One or two    |                                                    |
|                                   | years of      | <b>Artemisia sieversiana</b> Ehrhart ex Willd.     |

|                    |                |                                                           |
|--------------------|----------------|-----------------------------------------------------------|
|                    | herbs          |                                                           |
|                    | Perennial      | <b>Artemisia lavandulifolia</b> Candolle                  |
|                    | herb           |                                                           |
|                    | Perennial      |                                                           |
|                    | herb or        |                                                           |
|                    | one/two year   | <b>Artemisia scoparia</b> Waldst. et Kit.                 |
|                    | herb           |                                                           |
|                    | Perennial      | <b>Crepis crocea</b> (Lam.) Babcock                       |
|                    | herb           |                                                           |
|                    | Perennial      | <b>Leibnitzia anandria</b> (Linnaeus) Turczaninow         |
|                    | herb           |                                                           |
|                    | Perennial      | <b>Artemisia desertorum</b> Spreng.                       |
|                    | herb           |                                                           |
|                    | Perennial      | <b>Saussurea hieracioides</b> Hook. f.                    |
|                    | herb           |                                                           |
|                    | Perennial      | <b>Ixeris chinensis</b> (Thunb.) Nakai                    |
|                    | herb           |                                                           |
|                    | Perennial      | <b>Cirsium arvense</b> var. <b>integrifolium</b> C. Wimm. |
|                    | herb           | et Grabowski                                              |
| Polygonaceae Juss. | Annual herb    | <b>Rumex maritimus</b> L.                                 |
|                    | Biennial or    |                                                           |
| Orobanchaceae Vent | perennial      | <b>Orobanche pycnostachya</b> Hance                       |
|                    | parasitic herb |                                                           |
|                    | Perennial      | <b>Geranium albiflorum</b> Ledeb.                         |
|                    | herb           |                                                           |
| Geraniaceae Juss.  | Perennial      | <b>Geranium sibiricum</b> L.                              |
|                    | herb           |                                                           |
|                    | One or two     |                                                           |
|                    | years of       | <b>Potentilla supina</b> L.                               |
|                    | herbs          |                                                           |
| Rosaceae Juss.     | Perennial      |                                                           |
|                    | herbaceous     | <b>Sibbaldianthe bifurca</b> (L.) Kurtto & T. Erikss.     |
|                    | or subshrub    |                                                           |
| Apiaceae Lindl.    | Perennial      | <b>Bupleurum smithii</b> Wolff                            |

|                         |                                 |                                                            |
|-------------------------|---------------------------------|------------------------------------------------------------|
|                         | herb                            |                                                            |
| Brassicaceae            | One or two<br>years of<br>herbs | <b>Lepidium apetalum</b> Willd.                            |
| Amaranthaceae Juss.     | Annual herb                     | <b>Chenopodium bryoniifolium</b> Bunge                     |
|                         | Annual herb                     | <b>Chenopodium album</b> L.                                |
|                         | Annual herb                     | <b>Bassia scoparia</b> (L.) A.J.Scott                      |
|                         | Annual herb                     | <b>Kali collinum</b> (Pall.) Akhani & Roalson              |
|                         | Annual herb                     | <b>Oxybasis glauca</b> (L.) S. Fuentes, Uotila &<br>Borsch |
| Convolvulaceae<br>Juss. | Perennial<br>herb               | <b>Convolvulus arvensis</b> L.                             |
| Boraginaceae Juss.      | Perennial<br>herb               | <b>Trigonotis radicans</b> (Turcz.) Stev.                  |
